# Supplementary material
Source: PubMed Central journal article supplement (PMC4041291)
Supplement: NIHMS583632-supplement-Supplementary_Data.pdf [file NIHMS583632-supplement-Supplementary_Data.pdf]

## SUPPLEMENTARY INFORMATION

### **Copper (II)-Human Amylin Complex Protects Pancreatic Cells from Amylin Toxicity**

<sup>1</sup>Elizabeth Lee <sup>a</sup>, <sup>1</sup>Emmeline Ha, <sup>1</sup>Sanghamitra Singh, Linda Legesse, Sana Ahmad, Elena Karnaukhova<sup>b</sup>, Robert P. Donaldson and Aleksandar M. Jeremic <sup>¶</sup>

Department of Biological Sciences, 2023 G Street NW, The George Washington University, Washington, DC 20052, and <sup>b</sup>Laboratory of Biochemistry and Vascular Biology, Division of Hematology, Center for Biologics Evaluation and Research, Food and Drug Administration, Bethesda, Maryland 20892, USA.

<sup>a</sup> Present address: Laboratory of Molecular Biology, National Cancer Institute, National Institutes of Health, Bethesda, Maryland 20892

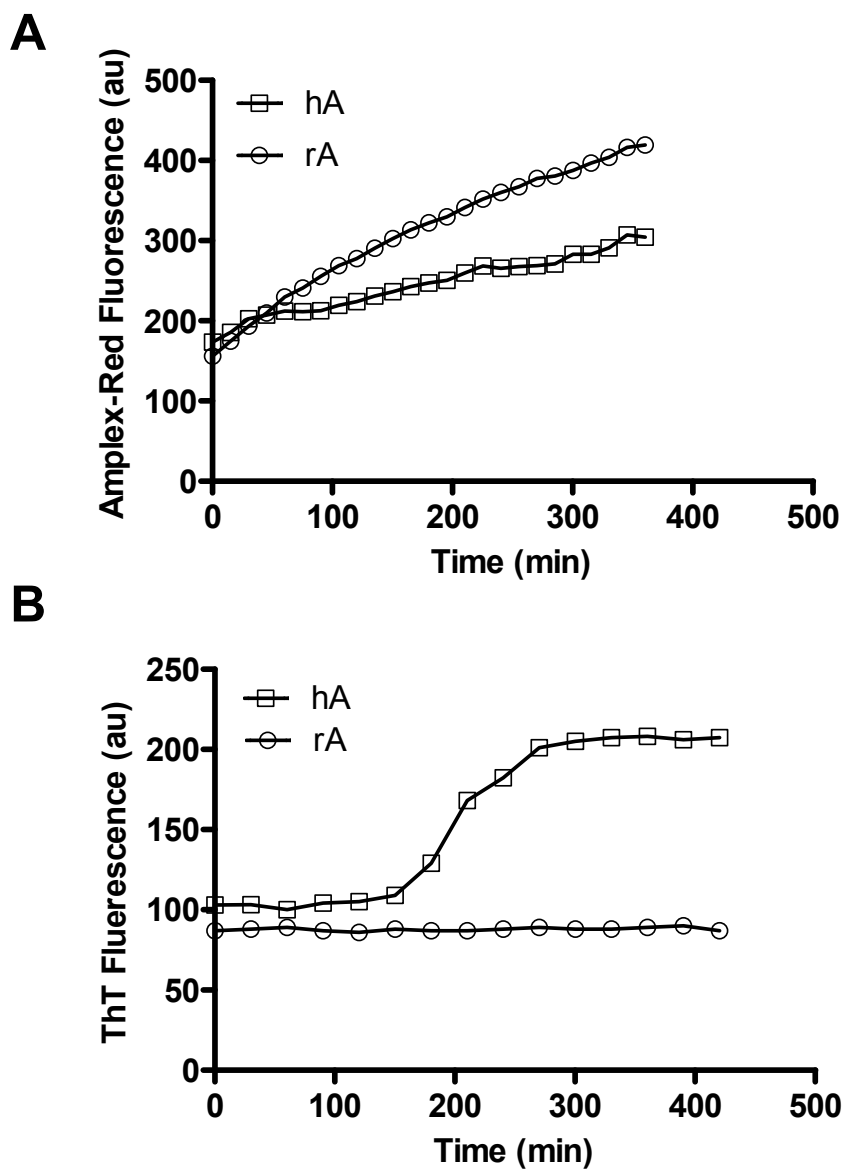

**Figure S1.** Amylin displays dissimilar aggregation and peroxide-forming kinetic rates. The human and rat amylin-induced peroxide formation (A) and aggregation rates (B) were investigated in real time by Amplex-Red and Th-T fluorescent assays, respectively. (A) Human and rat amylin (20  $\mu$ M) generated comparable  $H_2O_2$  levels over time. (B) Human but not rat amylin slowly aggregated in solution.

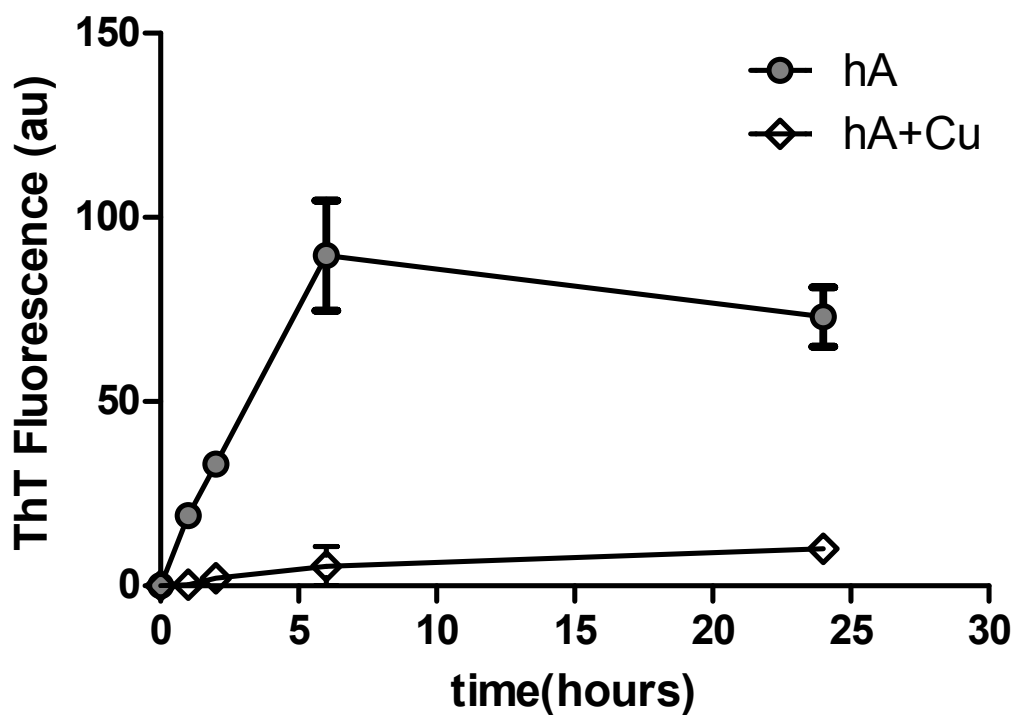

**Figure S2.**  $\text{Cu}^{2+}$  inhibits human amylin aggregation. 20  $\mu\text{M}$  of human amylin was incubated in phosphate buffer, in the absence or presence of equimolar  $\text{CuCl}_2$  and the extent of amylin-aggregation analyzed during 24h by end-point Th-T fluorescent assay.

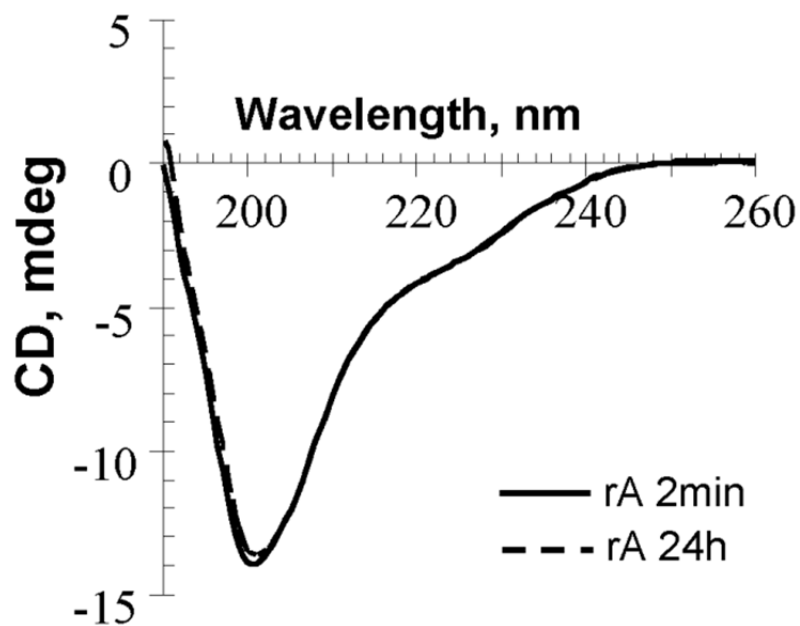

**Figure S3.** Dynamics of rat amylin secondary conformation in solution examined by CD spectroscopy. Following dissolution, conformation changes of rat amylin (20  $\mu$ M) was monitored by CD during 24h period. Rat amylin retained random coil conformation throughout the experiment.

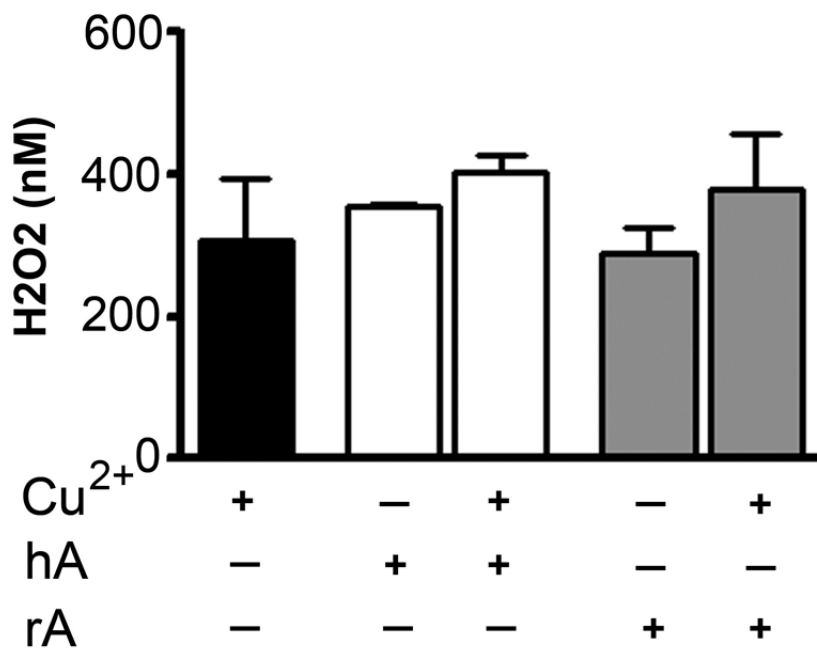

**Figure S4.** Effect of  $\text{Cu}^{2+}$  on amylin-evoked peroxide production in vitro. 20  $\mu\text{M}$  of human amylin was added to phosphate buffer that was or was not supplemented with 20  $\mu\text{M}$   $\text{CuCl}_2$  and the extent of  $\text{H}_2\text{O}_2$  production analyzed by Amplex-Red fluorescent assay. Supplementation of  $\text{Cu}^{2+}$  had no significant effect on amylin-evoked  $\text{H}_2\text{O}_2$  production and accumulation in solution.

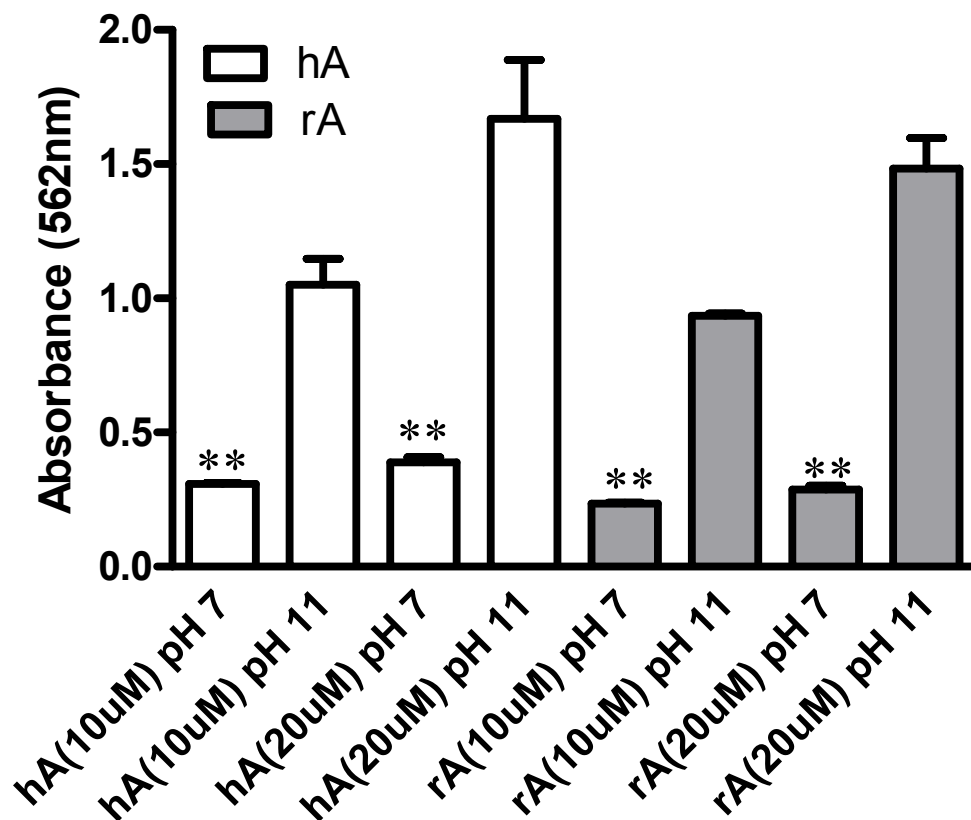

**Figure S5.** Reduction of  $\text{Cu}^{2+}$  by human and rat amylin is pH-dependent. Bicinchoninic (BCA) reagent was used to detect the reduction of  $\text{Cu}^{2+}$  to  $\text{Cu}^{1+}$  by human and rat amylin under alkaline and neutral conditions. Human and rat amylin (10 and 20  $\mu\text{M}$ ) were mixed with  $\text{CuSO}_4$  and BCA reagent solution (Pierce) at pH=11 and pH=7 for 60 min. Following the treatments, changes in BCA absorbance were determined. At pH=11, both amylin isoforms reduced  $\text{Cu}^{2+}$  to  $\text{Cu}^{1+}$  indicated by an increase in BCA absorbance at 562 nm (absorption maximum for  $\text{Cu}^{1+}$ -BCA complex). In contrast, amylin was much less effective in reducing  $\text{Cu}^{2+}$  at a biologically-relevant pH value (pH=7). Significance established at \*\*  $P < 0.01$ , hA, pH=11 vs. hA, pH=7, Student's t-test, n=6.
